# Supplementary material for: FREQ-Seq2: a method for precise high-throughput combinatorial quantification of allele frequencies
Source: PubMed Central journal article supplement (PMC10542570; doi:10.1093/g3journal/jkad162), 2023-07-26
Supplement: jkad162_supplementary_data.pdf [file jkad162_supplementary_data.pdf]

# Supplementary Material

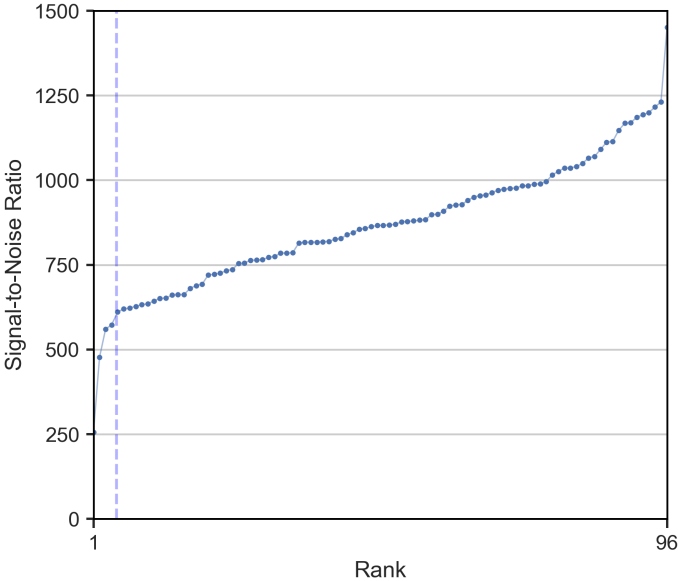

**Figure S1.** Rank-frequency distribution of signal-to-noise ratio (SNR) for FREQ-Seq<sup>2</sup> read coverage across 96 independent control sample barcode combinations. The dashed blue line indicates the point of the 0.05 quantile.

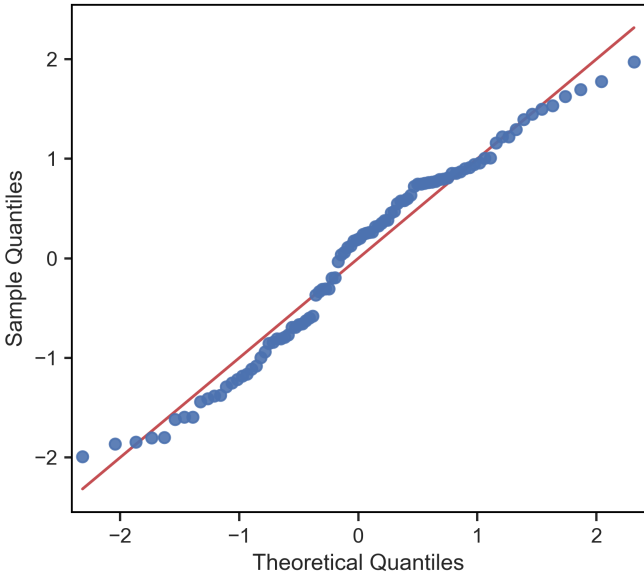

**Figure S2.** Normal Q-Q plot for error in allele frequency measurements in the control samples.

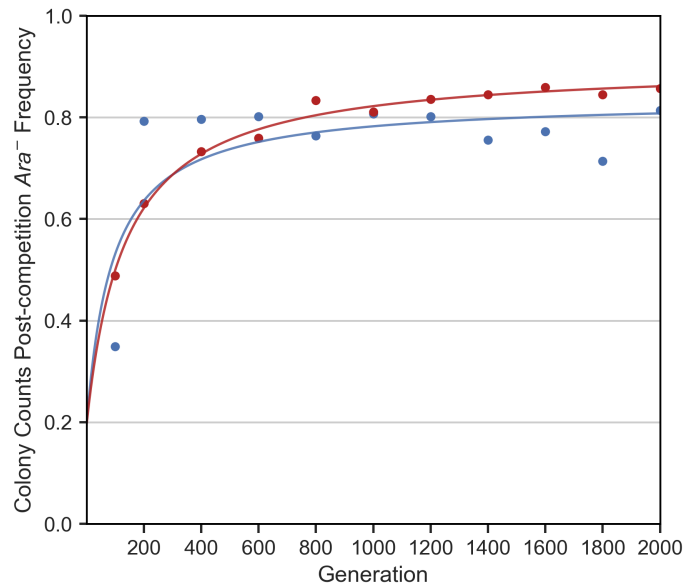

**Figure S3.** Expected and observed post-competition Ara<sup>-</sup> allele frequencies for the colony count samples. The blue points are the empirical frequencies measured by colony counting and the red points are the frequencies expected given the measured initial conditions under the independently derived power law model from the FREQ-Seq<sup>2</sup> samples. The curves are the corresponding hyperbolic model fits.

**Table S1.** Sequences of the 48 FREQ-Seq barcodes.

| <b>Label</b> | <b>Sequence</b> |
|--------------|-----------------|
| 01           | AGCAAT          |
| 02           | CCTGTT          |
| 03           | GGGTTT          |
| 04           | GAAGGC          |
| 05           | ATCTCA          |
| 06           | ATGGAT          |
| 07           | ATGTCT          |
| 08           | CGTGAC          |
| 09           | TTAGGT          |
| 10           | GTGCAT          |
| 11           | AACTTT          |
| 12           | GGATCG          |
| 13           | ATAAGG          |
| 14           | ATTGGT          |
| 15           | AGTGAG          |
| 16           | CCCACC          |
| 17           | CGATGC          |
| 18           | GATAGC          |
| 19           | GTCAGA          |
| 20           | TTAAGC          |
| 21           | AACCTG          |
| 22           | CTTTGC          |
| 23           | TGGAGA          |
| 24           | AATTGT          |
| 25           | TGACGA          |
| 26           | CAAATA          |
| 27           | G TTCAG         |
| 28           | CTTCAA          |
| 29           | GTTGGG          |
| 30           | GCTTAG          |
| 31           | TAGCCA          |
| 32           | TA ACTT         |
| 33           | CGGATA          |
| 34           | CAGCAG          |
| 35           | AAGTAG          |
| 36           | GGGACG          |
| 37           | CCGTGG          |
| 38           | ATTGTA          |
| 39           | TTTAGA          |
| 40           | CCACGA          |
| 41           | TCATGG          |
| 42           | GAACCA          |
| 43           | TCCTAA          |
| 44           | CAACGC          |
| 45           | AGTGTT          |
| 46           | GGATTA          |
| 47           | TATATA          |
| 48           | GTACAA          |

**Table S2.** Sequences of the primers, adapters, flanking regions, and alleles for the FREQ-Seq<sup>2</sup> libraries.

| Type                                                     | Sequence              |
|----------------------------------------------------------|-----------------------|
| Barcode 1 amplification primer ('ABC1')                  | AATGATACGGCGACCAC     |
| Barcode 1 amplification primer ('ABC2')                  | ACTGGCCGTCGTTTTAC     |
| Barcode 2 amplification primer                           | AAGCAGAAGACGGCATAACG  |
| Barcode 2 amplification primer                           | GTAAGCAGTGGGTTCTCTAG  |
| Forward adapter sequence                                 | GTAAAACGACGGCCAGT     |
| Reverse adapter sequence                                 | CTAGAGAACCCACTGCTTAC  |
| Upstream allele flanking region                          | CGGCCAAAATGTGGATCAACG |
| Downstream allele flanking region                        | CCTGACCATG            |
| <i>Ara</i> <sup>-</sup> / <i>Ara</i> <sup>+</sup> allele | A / G                 |
